# Supplementary material for: Single-Camera Trap Survey Designs Miss Detections: Impacts on Estimates of Occupancy and Community Metrics
Source: PLoS One. 2016 Nov 30;11(11):e0166689. doi: 10.1371/journal.pone.0166689 (PMC5130212; doi:10.1371/journal.pone.0166689)
Supplement: S1 Dataset — (CSV) [file pone.0166689.s001.csv]

Reference	Station	Species	DateTime
1	NF01	Opossum	2/2/2016 13:02
2	NF01	Raccoon	1/31/2016 7:57
3	NF01	Raccoon	1/31/2016 7:58
4	NF01	Raccoon	2/2/2016 7:16
5	NF01	Raccoon	2/2/2016 7:17
6	NF01	Raccoon	2/2/2016 7:40
7	NF01	Raccoon	2/2/2016 7:41
8	NF01	Raccoon	2/3/2016 3:30
9	NF01	Raccoon	2/6/2016 0:54
10	NF01	Raccoon	2/6/2016 5:31
11	NF01	Raccoon	2/6/2016 16:46
12	NF01	Raccoon	2/13/2016 20:04
13	NF01	White-tailed Deer	1/30/2016 7:30
14	NF01	White-tailed Deer	1/30/2016 7:32
15	NF01	White-tailed Deer	1/30/2016 7:33
16	NF01	White-tailed Deer	1/30/2016 7:34
17	NF01	White-tailed Deer	1/30/2016 7:35
18	NF01	White-tailed Deer	1/30/2016 7:35
19	NF01	White-tailed Deer	1/30/2016 7:36
20	NF01	White-tailed Deer	1/30/2016 7:37
21	NF01	White-tailed Deer	1/30/2016 7:37
22	NF01	White-tailed Deer	1/30/2016 7:38
23	NF01	White-tailed Deer	1/30/2016 7:38
24	NF01	White-tailed Deer	1/30/2016 7:39
25	NF01	White-tailed Deer	1/30/2016 7:39
26	NF01	White-tailed Deer	1/30/2016 7:40
27	NF01	White-tailed Deer	1/30/2016 7:40
28	NF01	White-tailed Deer	1/30/2016 7:41
29	NF01	White-tailed Deer	1/30/2016 7:41
30	NF01	White-tailed Deer	1/30/2016 7:41
31	NF01	White-tailed Deer	1/30/2016 7:41
32	NF01	White-tailed Deer	1/30/2016 7:42
33	NF01	White-tailed Deer	1/30/2016 7:42
34	NF01	White-tailed Deer	1/30/2016 7:43
35	NF01	White-tailed Deer	1/30/2016 7:44
36	NF01	White-tailed Deer	1/30/2016 7:44
37	NF01	White-tailed Deer	1/30/2016 7:46
38	NF01	White-tailed Deer	1/30/2016 7:46
39	NF01	White-tailed Deer	1/30/2016 7:47
40	NF01	White-tailed Deer	1/30/2016 7:47
41	NF01	White-tailed Deer	1/30/2016 7:48
42	NF01	White-tailed Deer	1/30/2016 7:48
43	NF01	White-tailed Deer	1/30/2016 7:48
44	NF01	White-tailed Deer	1/30/2016 7:49
45	NF01	White-tailed Deer	1/30/2016 7:56
46	NF02	Gray Squirrel	1/27/2016 15:00
47	NF02	Gray Squirrel	1/27/2016 15:20
48	NF02	Gray Squirrel	1/27/2016 15:47
49	NF02	Gray Squirrel	1/29/2016 15:26
50	NF02	Gray Squirrel	1/29/2016 15:27
51	NF02	Gray Squirrel	1/31/2016 6:54
52	NF02	Gray Squirrel	2/6/2016 14:54
53	NF02	Gray Squirrel	2/6/2016 17:26
54	NF02	Gray Squirrel	2/10/2016 17:28
55	NF02	Gray Squirrel	2/16/2016 17:43
56	NF02	Gray Squirrel	2/16/2016 17:46
57	NF02	Raccoon	1/25/2016 20:59
58	NF02	Raccoon	1/25/2016 21:31
59	NF02	Raccoon	1/27/2016 17:51
60	NF02	Raccoon	1/27/2016 23:48
61	NF02	Raccoon	1/27/2016 23:56
62	NF02	Raccoon	1/27/2016 23:56
63	NF02	Raccoon	1/27/2016 23:57
64	NF02	Raccoon	1/28/2016 1:55
65	NF02	Raccoon	1/28/2016 2:11
66	NF02	Raccoon	1/28/2016 6:29
67	NF02	Raccoon	1/28/2016 6:34
68	NF02	Raccoon	1/28/2016 6:39
69	NF02	Raccoon	1/28/2016 6:39
70	NF02	Raccoon	1/28/2016 6:39
71	NF02	Raccoon	1/28/2016 11:24
72	NF02	Raccoon	1/28/2016 11:24
73	NF02	Raccoon	1/28/2016 19:20
74	NF02	Raccoon	1/28/2016 19:21
75	NF02	Raccoon	1/29/2016 6:28
76	NF02	Raccoon	1/29/2016 6:38
77	NF02	Raccoon	1/29/2016 6:38
78	NF02	Raccoon	1/29/2016 6:45
79	NF02	Raccoon	1/29/2016 8:29
80	NF02	Raccoon	1/29/2016 8:29
81	NF02	Raccoon	1/29/2016 17:45
82	NF02	Raccoon	1/29/2016 17:45
83	NF02	Raccoon	1/29/2016 20:04
84	NF02	Raccoon	1/29/2016 20:04
85	NF02	Raccoon	1/29/2016 20:19
86	NF02	Raccoon	1/30/2016 3:49
87	NF02	Raccoon	1/30/2016 4:09
88	NF02	Raccoon	1/30/2016 4:09
89	NF02	Raccoon	1/30/2016 4:10
90	NF02	Raccoon	1/30/2016 4:56
91	NF02	Raccoon	2/1/2016 22:44
92	NF02	Raccoon	2/1/2016 22:44
93	NF02	Raccoon	2/1/2016 23:18
94	NF02	Raccoon	2/2/2016 3:55
95	NF02	Raccoon	2/2/2016 6:06
96	NF02	Raccoon	2/3/2016 22:54
97	NF02	Raccoon	2/3/2016 23:33
98	NF02	Raccoon	2/4/2016 0:39
99	NF02	Raccoon	2/4/2016 1:27
100	NF02	Raccoon	2/4/2016 6:35
101	NF02	Raccoon	2/4/2016 6:36
102	NF02	Raccoon	2/6/2016 23:03
103	NF02	Raccoon	2/7/2016 18:16
104	NF02	Raccoon	2/7/2016 18:16
105	NF02	Raccoon	2/10/2016 16:59
106	NF02	Raccoon	2/10/2016 16:59
107	NF02	White-tailed Deer	2/2/2016 17:11
108	NF02	White-tailed Deer	2/2/2016 17:13
109	NF03	Gray Squirrel	1/24/2016 17:09
110	NF03	Gray Squirrel	1/24/2016 17:11
111	NF03	Gray Squirrel	1/24/2016 17:12
112	NF03	Gray Squirrel	1/24/2016 17:15
113	NF03	Gray Squirrel	1/24/2016 17:18
114	NF03	Gray Squirrel	1/24/2016 17:21
115	NF03	Gray Squirrel	1/25/2016 7:05
116	NF03	Gray Squirrel	1/26/2016 6:57
117	NF03	Gray Squirrel	1/27/2016 7:07
118	NF03	Gray Squirrel	1/27/2016 7:10
119	NF03	Gray Squirrel	1/27/2016 17:32
120	NF03	Gray Squirrel	1/29/2016 8:22
121	NF03	Gray Squirrel	2/1/2016 7:12
122	NF03	Gray Squirrel	2/4/2016 7:10
123	NF03	Gray Squirrel	2/4/2016 16:14
124	NF03	Gray Squirrel	2/4/2016 17:30
125	NF03	Gray Squirrel	2/4/2016 17:36
126	NF03	Gray Squirrel	2/5/2016 6:54
127	NF03	Gray Squirrel	2/5/2016 17:19
128	NF03	Gray Squirrel	2/5/2016 17:22
129	NF03	Gray Squirrel	2/5/2016 17:43
130	NF03	Gray Squirrel	2/6/2016 17:49
131	NF03	Gray Squirrel	2/6/2016 17:54
132	NF03	Gray Squirrel	2/7/2016 6:50
133	NF03	Gray Squirrel	2/7/2016 7:01
134	NF03	Gray Squirrel	2/8/2016 6:41
135	NF03	Gray Squirrel	2/10/2016 6:40
136	NF03	Gray Squirrel	2/13/2016 6:45
137	NF03	Gray Squirrel	2/13/2016 6:46
138	NF03	Gray Squirrel	2/14/2016 6:36
139	NF03	Gray Squirrel	2/17/2016 6:26
140	NF03	Gray Squirrel	2/18/2016 6:15
141	NF03	Raccoon	2/11/2016 23:23
142	NF03	White-tailed Deer	2/18/2016 8:20
143	NF03	White-tailed Deer	2/18/2016 8:21
144	NF03	White-tailed Deer	2/18/2016 8:26
145	NF03	White-tailed Deer	2/18/2016 8:27
146	NF03	White-tailed Deer	2/18/2016 8:33
147	NF03	White-tailed Deer	2/18/2016 8:33
148	NF03	White-tailed Deer	2/18/2016 8:36
149	NF04	Bobcat	2/1/2016 10:25
150	NF04	Bobcat	2/8/2016 16:50
151	NF04	Bobcat	2/15/2016 14:53
152	NF04	Gray Squirrel	1/23/2016 17:22
153	NF04	Gray Squirrel	1/23/2016 17:24
154	NF04	Gray Squirrel	1/23/2016 17:32
155	NF04	Gray Squirrel	1/28/2016 17:32
156	NF04	Gray Squirrel	1/28/2016 17:33
157	NF04	Gray Squirrel	1/29/2016 6:52
158	NF04	Gray Squirrel	1/29/2016 6:54
159	NF04	Gray Squirrel	2/1/2016 6:39
160	NF04	Gray Squirrel	2/1/2016 6:43
161	NF04	Gray Squirrel	2/1/2016 6:49
162	NF04	Gray Squirrel	2/1/2016 6:51
163	NF04	Gray Squirrel	2/1/2016 8:35
164	NF04	Gray Squirrel	2/1/2016 8:35
165	NF04	Gray Squirrel	2/1/2016 8:57
166	NF04	Gray Squirrel	2/4/2016 7:26
167	NF04	Gray Squirrel	2/4/2016 7:53
168	NF04	Gray Squirrel	2/6/2016 8:49
169	NF04	Gray Squirrel	2/7/2016 7:12
170	NF04	Gray Squirrel	2/9/2016 6:43
171	NF04	Gray Squirrel	2/13/2016 6:34
172	NF04	Gray Squirrel	2/13/2016 6:35
173	NF04	Opossum	2/4/2016 15:17
174	NF04	Raccoon	1/25/2016 0:00
175	NF04	Raccoon	1/25/2016 0:01
176	NF04	Raccoon	1/26/2016 1:28
177	NF04	Raccoon	1/26/2016 1:31
178	NF04	Raccoon	2/3/2016 19:42
179	NF04	Raccoon	2/3/2016 19:42
180	NF04	Raccoon	2/3/2016 19:44
181	NF04	Turkey	2/11/2016 17:36
182	NF04	Turkey	2/11/2016 17:37
183	NF04	White-tailed Deer	1/27/2016 17:45
184	NF04	White-tailed Deer	1/27/2016 17:45
185	NF04	White-tailed Deer	1/27/2016 17:46
186	NF04	White-tailed Deer	1/27/2016 17:49
187	NF04	White-tailed Deer	1/27/2016 17:49
188	NF04	White-tailed Deer	1/27/2016 20:08
189	NF04	White-tailed Deer	1/27/2016 20:11
190	NF04	White-tailed Deer	1/27/2016 20:12
191	NF05	Bobcat	1/23/2016 7:59
192	NF05	Bobcat	2/7/2016 8:14
193	NF05	Bobcat	2/13/2016 10:23
194	NF05	Bobcat	2/13/2016 10:23
195	NF05	Bobcat	2/13/2016 10:24
196	NF05	Bobcat	2/13/2016 10:25
197	NF05	Bobcat	2/14/2016 14:07
198	NF05	Gray Squirrel	1/28/2016 7:01
199	NF05	Gray Squirrel	1/28/2016 17:35
200	NF05	Gray Squirrel	1/29/2016 7:01
201	NF05	Gray Squirrel	1/29/2016 8:22
202	NF05	Gray Squirrel	2/1/2016 7:18
203	NF05	Gray Squirrel	2/1/2016 17:22
204	NF05	Gray Squirrel	2/4/2016 7:11
205	NF05	Gray Squirrel	2/4/2016 7:16
206	NF05	Gray Squirrel	2/6/2016 7:19
207	NF05	Gray Squirrel	2/6/2016 7:21
208	NF05	Gray Squirrel	2/13/2016 6:28
209	NF05	Gray Squirrel	2/13/2016 6:33
210	NF05	Gray Squirrel	2/13/2016 6:34
211	NF05	Gray Squirrel	2/20/2016 7:04
212	NF05	Gray Squirrel	2/20/2016 7:23
213	NF05	Raccoon	1/19/2016 1:46
214	NF05	Raccoon	1/19/2016 1:47
215	NF05	Raccoon	1/19/2016 1:47
216	NF05	Raccoon	1/19/2016 2:17
217	NF05	Raccoon	1/19/2016 2:20
218	NF05	Raccoon	1/24/2016 14:37
219	NF05	Raccoon	1/24/2016 15:07
220	NF05	Raccoon	1/27/2016 4:27
221	NF05	Raccoon	1/27/2016 4:27
222	NF05	Raccoon	2/2/2016 18:24
223	NF05	Raccoon	2/2/2016 18:25
224	NF05	Raccoon	2/3/2016 19:21
225	NF05	Raccoon	2/3/2016 19:22
226	NF05	Raccoon	2/3/2016 19:57
227	NF05	Raccoon	2/5/2016 19:59
228	NF05	Raccoon	2/5/2016 21:46
229	NF05	Raccoon	2/5/2016 21:49
230	NF06	Gray Squirrel	2/4/2016 6:36
231	NF06	Raccoon	2/2/2016 18:12
232	NF06	Raccoon	2/4/2016 21:36
233	NF06	Raccoon	2/6/2016 20:51
234	NF06	Raccoon	2/12/2016 19:59
235	NF06	White-tailed Deer	1/18/2016 8:48
236	NF06	White-tailed Deer	1/18/2016 8:49
237	NF06	White-tailed Deer	2/4/2016 17:36
238	NF06	White-tailed Deer	2/4/2016 17:36
239	NF06	White-tailed Deer	2/4/2016 19:21
240	NF06	White-tailed Deer	2/4/2016 19:22
241	NF06	White-tailed Deer	2/4/2016 19:24
242	NF06	White-tailed Deer	2/4/2016 19:25
243	NF06	White-tailed Deer	2/4/2016 19:25
244	NF06	White-tailed Deer	2/17/2016 11:15
245	NF06	White-tailed Deer	2/17/2016 11:16
246	NF06	White-tailed Deer	2/17/2016 11:16
247	NF06	White-tailed Deer	2/17/2016 11:16
248	NF06	White-tailed Deer	2/17/2016 11:17
249	NF06	White-tailed Deer	2/17/2016 11:17
250	NF06	White-tailed Deer	2/17/2016 11:17
251	NF06	White-tailed Deer	2/17/2016 11:18
252	NF06	White-tailed Deer	2/17/2016 16:48
253	NF07	Bobcat	1/31/2016 6:23
254	NF07	Coyote	1/20/2016 17:24
255	NF07	Coyote	1/20/2016 17:27
256	NF07	Coyote	1/20/2016 19:58
257	NF07	Coyote	2/1/2016 1:02
258	NF07	Coyote	2/1/2016 1:05
259	NF07	Coyote	2/1/2016 1:09
260	NF07	Coyote	2/1/2016 1:10
261	NF07	Coyote	2/1/2016 1:11
262	NF07	Coyote	2/1/2016 1:13
263	NF07	Coyote	2/1/2016 1:30
264	NF07	Gray Squirrel	1/23/2016 17:29
265	NF07	Gray Squirrel	2/6/2016 17:44
266	NF07	Gray Squirrel	2/13/2016 23:41
267	NF07	Gray Squirrel	2/14/2016 6:36
268	NF07	Opossum	2/6/2016 18:49
269	NF07	Raccoon	1/28/2016 18:18
270	NF07	Raccoon	2/5/2016 23:11
271	NF07	Raccoon	2/5/2016 23:13
272	NF07	Raccoon	2/8/2016 7:12
273	NF07	Raccoon	2/8/2016 7:24
274	NF07	Raccoon	2/8/2016 7:34
275	NF07	Raccoon	2/11/2016 18:21
276	NF07	Raccoon	2/19/2016 23:42
277	NF07	Turkey	1/20/2016 14:25
278	NF07	Turkey	2/5/2016 4:21
279	NF07	Turkey	2/5/2016 11:20
280	NF07	White-tailed Deer	1/19/2016 16:11
281	NF07	White-tailed Deer	1/19/2016 16:11
282	NF07	White-tailed Deer	2/1/2016 19:07
283	NF07	White-tailed Deer	2/1/2016 19:07
284	NF07	White-tailed Deer	2/1/2016 19:12
285	NF07	White-tailed Deer	2/1/2016 19:14
286	NF07	White-tailed Deer	2/3/2016 17:05
287	NF07	White-tailed Deer	2/3/2016 17:07
288	NF07	White-tailed Deer	2/3/2016 17:08
289	NF07	White-tailed Deer	2/3/2016 17:09
290	NF07	White-tailed Deer	2/7/2016 11:15
291	NF07	White-tailed Deer	2/7/2016 11:18
292	NF07	White-tailed Deer	2/7/2016 18:17
293	NF07	White-tailed Deer	2/7/2016 18:18
294	NF07	White-tailed Deer	2/7/2016 18:18
295	NF07	White-tailed Deer	2/7/2016 18:18
296	NF07	White-tailed Deer	2/7/2016 18:24
297	NF07	White-tailed Deer	2/7/2016 18:25
298	NF07	White-tailed Deer	2/7/2016 18:30
299	NF07	White-tailed Deer	2/8/2016 16:13
300	NF07	White-tailed Deer	2/10/2016 16:59
301	NF07	White-tailed Deer	2/10/2016 17:20
302	NF07	White-tailed Deer	2/10/2016 17:20
303	NF07	White-tailed Deer	2/10/2016 17:22
304	NF07	White-tailed Deer	2/10/2016 17:24
305	NF07	White-tailed Deer	2/10/2016 17:25
306	NF07	White-tailed Deer	2/10/2016 17:26
307	NF07	White-tailed Deer	2/10/2016 17:26
308	NF07	White-tailed Deer	2/10/2016 17:27
309	NF07	White-tailed Deer	2/10/2016 17:28
310	NF07	White-tailed Deer	2/14/2016 15:26
311	NF07	White-tailed Deer	2/14/2016 15:27
312	NF07	White-tailed Deer	2/14/2016 15:27
313	NF08	Gray Squirrel	2/20/2016 6:30
314	NF08	Gray Squirrel	2/20/2016 8:05
315	NF08	Opossum	2/17/2016 16:38
316	NF08	Raccoon	2/18/2016 19:01
317	NF09	Coyote	2/1/2016 5:23
318	NF09	Coyote	2/5/2016 3:09
319	NF09	Coyote	2/14/2016 17:21
320	NF09	Gray Squirrel	1/19/2016 7:07
321	NF09	Gray Squirrel	1/19/2016 7:07
322	NF09	Gray Squirrel	1/28/2016 6:54
323	NF09	Gray Squirrel	1/29/2016 7:58
324	NF09	Gray Squirrel	1/29/2016 9:10
325	NF09	Gray Squirrel	1/29/2016 9:39
326	NF09	Gray Squirrel	1/29/2016 9:39
327	NF09	Gray Squirrel	2/4/2016 8:36
328	NF09	Gray Squirrel	2/5/2016 17:14
329	NF09	Gray Squirrel	2/5/2016 17:43
330	NF09	Gray Squirrel	2/13/2016 17:21
331	NF09	Gray Squirrel	2/16/2016 6:38
332	NF09	Gray Squirrel	2/20/2016 7:42
333	NF09	Gray Squirrel	2/20/2016 7:43
334	NF09	Opossum	2/1/2016 19:06
335	NF09	Opossum	2/1/2016 19:07
336	NF09	Raccoon	1/28/2016 3:57
337	NF09	Raccoon	1/28/2016 4:02
338	NF09	Raccoon	1/28/2016 18:21
339	NF09	Raccoon	1/28/2016 18:27
340	NF09	Raccoon	1/28/2016 18:28
341	NF09	Raccoon	2/20/2016 0:46
342	NF09	Raccoon	2/20/2016 0:54
343	NF09	White-tailed Deer	1/30/2016 6:11
344	NF09	White-tailed Deer	1/30/2016 6:17
345	NF09	White-tailed Deer	1/30/2016 6:17
346	NF09	White-tailed Deer	1/30/2016 6:20
347	NF09	White-tailed Deer	1/30/2016 6:21
348	NF09	White-tailed Deer	1/30/2016 6:21
349	NF09	White-tailed Deer	1/30/2016 6:22
350	NF09	White-tailed Deer	1/30/2016 6:23
351	NF09	White-tailed Deer	1/30/2016 6:24
352	NF09	White-tailed Deer	1/30/2016 6:25
353	NF09	White-tailed Deer	1/30/2016 6:25
354	NF09	White-tailed Deer	1/30/2016 6:25
355	NF09	White-tailed Deer	1/30/2016 6:26
356	NF09	White-tailed Deer	1/30/2016 6:27
357	NF09	White-tailed Deer	1/30/2016 6:27
358	NF09	White-tailed Deer	1/30/2016 6:28
359	NF09	White-tailed Deer	1/30/2016 6:29
360	NF09	White-tailed Deer	2/6/2016 9:02
361	NF09	White-tailed Deer	2/6/2016 9:03
362	NF09	White-tailed Deer	2/6/2016 9:09
363	NF09	White-tailed Deer	2/6/2016 9:09
364	NF09	White-tailed Deer	2/20/2016 11:05
365	NF10	Gray Squirrel	1/24/2016 6:45
366	NF10	Gray Squirrel	1/31/2016 19:19
367	NF10	Gray Squirrel	2/4/2016 17:33
368	NF10	Gray Squirrel	2/4/2016 17:33
369	NF10	Gray Squirrel	2/5/2016 16:09
370	NF10	Gray Squirrel	2/12/2016 6:29
371	NF10	Gray Squirrel	2/12/2016 6:30
372	NF10	Gray Squirrel	2/12/2016 6:41
373	NF10	Gray Squirrel	2/13/2016 6:32
374	NF10	Gray Squirrel	2/17/2016 6:21
375	NF10	Gray Squirrel	2/18/2016 6:31
376	NF10	Gray Squirrel	2/20/2016 6:28
377	NF10	Gray Squirrel	2/20/2016 6:37
378	NF10	Gray Squirrel	2/20/2016 6:39
379	NF10	Gray Squirrel	2/20/2016 6:40
380	NF10	Gray Squirrel	2/20/2016 6:41
381	NF10	Gray Squirrel	2/20/2016 6:42
382	NF10	Gray Squirrel	2/20/2016 6:42
383	NF10	Gray Squirrel	2/20/2016 6:49
384	NF10	Gray Squirrel	2/20/2016 7:00
385	NF10	Gray Squirrel	2/20/2016 7:01
386	NF10	Gray Squirrel	2/20/2016 7:02
387	NF10	Gray Squirrel	2/20/2016 7:49
388	NF10	Opossum	2/7/2016 0:01
389	NF10	Opossum	2/7/2016 0:07
390	NF10	Opossum	2/17/2016 19:34
391	NF10	Raccoon	1/26/2016 5:12
392	NF10	Raccoon	2/6/2016 2:28
393	NF10	Raccoon	2/6/2016 2:48
394	NF10	Raccoon	2/6/2016 5:25
395	NF10	Raccoon	2/6/2016 5:29
396	NF10	Raccoon	2/6/2016 19:10
397	NF10	Raccoon	2/6/2016 19:17
398	NF10	Raccoon	2/6/2016 19:19
399	NF10	Raccoon	2/7/2016 5:25
400	NF10	Raccoon	2/7/2016 6:35
401	NF10	Raccoon	2/7/2016 6:35
402	NF10	Raccoon	2/7/2016 7:24
403	NF10	Raccoon	2/8/2016 9:57
404	NF10	Raccoon	2/15/2016 14:52
405	NF10	White-tailed Deer	1/23/2016 15:50
406	NF10	White-tailed Deer	1/31/2016 16:16
407	NF10	White-tailed Deer	1/31/2016 16:16
408	NF10	White-tailed Deer	1/31/2016 16:17
409	NF10	White-tailed Deer	1/31/2016 16:17
410	NF10	White-tailed Deer	1/31/2016 16:18
411	NF10	White-tailed Deer	1/31/2016 16:18
412	NF10	White-tailed Deer	1/31/2016 16:19
413	NF10	White-tailed Deer	1/31/2016 16:19
414	NF10	White-tailed Deer	1/31/2016 16:20
415	NF10	White-tailed Deer	1/31/2016 16:20
416	NF10	White-tailed Deer	1/31/2016 16:21
417	NF10	White-tailed Deer	1/31/2016 16:21
418	NF10	White-tailed Deer	1/31/2016 16:22
419	NF10	White-tailed Deer	1/31/2016 16:22
420	NF10	White-tailed Deer	1/31/2016 16:23
421	NF10	White-tailed Deer	1/31/2016 16:23
422	NF10	White-tailed Deer	1/31/2016 16:24
423	NF10	White-tailed Deer	1/31/2016 16:24
424	NF10	White-tailed Deer	1/31/2016 16:25
425	NF10	White-tailed Deer	1/31/2016 16:25
426	NF10	White-tailed Deer	1/31/2016 16:26
427	NF10	White-tailed Deer	1/31/2016 16:26
428	NF10	White-tailed Deer	1/31/2016 17:01
429	NF10	White-tailed Deer	1/31/2016 17:01
430	NF10	White-tailed Deer	1/31/2016 17:06
431	NF10	White-tailed Deer	2/1/2016 16:33
432	NF10	White-tailed Deer	2/10/2016 9:17
433	NF10	White-tailed Deer	2/10/2016 9:29
434	NF10	White-tailed Deer	2/10/2016 9:30
435	NF10	White-tailed Deer	2/10/2016 9:31
436	SF01	Raccoon	12/19/2015 8:09
437	SF01	Raccoon	12/20/2015 21:28
438	SF02	Coyote	12/23/2015 6:01
439	SF02	Coyote	12/29/2015 23:53
440	SF02	Coyote	12/29/2015 23:54
441	SF02	Coyote	12/30/2015 1:01
442	SF02	Coyote	12/30/2015 1:02
443	SF02	Coyote	12/30/2015 1:27
444	SF02	Coyote	12/30/2015 1:28
445	SF02	Coyote	12/30/2015 1:30
446	SF02	Gray Squirrel	12/31/2015 17:01
447	SF02	Opossum	12/24/2015 22:18
448	SF02	Opossum	12/24/2015 23:24
449	SF02	Opossum	12/24/2015 23:24
450	SF02	White-tailed Deer	12/23/2015 15:24
451	SF02	White-tailed Deer	12/23/2015 15:30
452	SF02	White-tailed Deer	12/29/2015 23:50
453	SF02	White-tailed Deer	1/9/2016 15:33
454	SF02	White-tailed Deer	1/9/2016 15:50
455	SF02	White-tailed Deer	1/9/2016 15:51
456	SF02	White-tailed Deer	1/11/2016 16:59
457	SF02	White-tailed Deer	1/11/2016 17:05
458	SF02	White-tailed Deer	1/11/2016 17:05
459	SF03	Gray Squirrel	1/3/2016 17:00
460	SF03	Gray Squirrel	1/5/2016 16:40
461	SF03	Gray Squirrel	1/7/2016 16:43
462	SF03	Raccoon	1/6/2016 23:51
463	SF04	Gray Squirrel	12/29/2015 6:47
464	SF04	Gray Squirrel	12/31/2015 6:59
465	SF04	Gray Squirrel	1/5/2016 17:08
466	SF04	Gray Squirrel	1/6/2016 17:20
467	SF04	Gray Squirrel	1/7/2016 6:52
468	SF04	Gray Squirrel	1/11/2016 6:48
469	SF04	Gray Squirrel	1/12/2016 6:52
470	SF04	Raccoon	12/20/2015 2:09
471	SF04	Raccoon	12/20/2015 2:10
472	SF04	Raccoon	12/31/2015 0:12
473	SF04	White-tailed Deer	12/25/2015 12:49
474	SF04	White-tailed Deer	12/25/2015 12:51
475	SF04	White-tailed Deer	12/25/2015 12:53
476	SF04	White-tailed Deer	12/25/2015 13:11
477	SF04	White-tailed Deer	12/31/2015 9:29
478	SF04	White-tailed Deer	1/5/2016 8:24
479	SF04	White-tailed Deer	1/5/2016 8:27
480	SF04	White-tailed Deer	1/5/2016 8:37
481	SF04	White-tailed Deer	1/5/2016 8:37
482	SF04	White-tailed Deer	1/5/2016 8:38
483	SF04	White-tailed Deer	1/5/2016 8:38
484	SF04	White-tailed Deer	1/5/2016 8:39
485	SF05	Bobcat	12/24/2015 9:01
486	SF05	Coyote	1/2/2016 22:22
487	SF05	Gray Squirrel	12/25/2015 16:45
488	SF05	Gray Squirrel	1/12/2016 16:25
489	SF05	Gray Squirrel	1/12/2016 16:28
490	SF05	Gray Squirrel	1/12/2016 16:28
491	SF05	Gray Squirrel	1/12/2016 16:31
492	SF05	Gray Squirrel	1/12/2016 16:32
493	SF05	Gray Squirrel	1/12/2016 16:35
494	SF05	Raccoon	1/13/2016 2:10
495	SF06	Coyote	1/5/2016 16:20
496	SF06	Coyote	1/13/2016 11:29
497	SF06	Coyote	1/13/2016 15:30
498	SF06	Gray Squirrel	12/22/2015 16:53
499	SF06	Gray Squirrel	12/24/2015 8:14
500	SF06	Gray Squirrel	12/29/2015 7:03
501	SF06	Gray Squirrel	1/5/2016 6:58
502	SF06	Opossum	12/25/2015 6:24
503	SF06	Raccoon	12/20/2015 3:04
504	SF06	Raccoon	12/20/2015 3:23
505	SF06	Raccoon	12/20/2015 3:24
506	SF06	Raccoon	12/30/2015 19:50
507	SF06	Raccoon	12/30/2015 20:44
508	SF06	Raccoon	12/30/2015 20:46
509	SF06	Raccoon	12/30/2015 22:46
510	SF06	Raccoon	12/30/2015 22:48
511	SF06	Raccoon	1/1/2016 19:01
512	SF06	Raccoon	1/1/2016 19:02
513	SF06	Raccoon	1/3/2016 0:55
514	SF06	Raccoon	1/4/2016 21:55
515	SF06	Raccoon	1/6/2016 0:55
516	SF06	Raccoon	1/6/2016 0:58
517	SF06	Raccoon	1/6/2016 4:03
518	SF06	Raccoon	1/12/2016 5:16
519	SF06	Raccoon	1/12/2016 5:17
520	SF06	Raccoon	1/12/2016 5:17
521	SF06	Raccoon	1/13/2016 2:44
522	SF06	White-tailed Deer	1/1/2016 6:58
523	SF06	White-tailed Deer	1/1/2016 7:03
524	SF06	White-tailed Deer	1/1/2016 7:06
525	SF06	White-tailed Deer	1/1/2016 7:07
526	SF06	White-tailed Deer	1/1/2016 7:08
527	SF06	White-tailed Deer	1/5/2016 16:14
528	SF07	Gray Squirrel	12/22/2015 8:02
529	SF07	Gray Squirrel	12/29/2015 7:40
530	SF07	Gray Squirrel	1/1/2016 16:56
531	SF07	Gray Squirrel	1/1/2016 16:59
532	SF07	Gray Squirrel	1/5/2016 17:10
533	SF07	Gray Squirrel	1/7/2016 16:50
534	SF07	Gray Squirrel	1/7/2016 16:55
535	SF07	Gray Squirrel	1/7/2016 17:02
536	SF07	Gray Squirrel	1/8/2016 8:05
537	SF07	Gray Squirrel	1/10/2016 17:04
538	SF07	Gray Squirrel	1/10/2016 17:05
539	SF07	Gray Squirrel	1/12/2016 7:08
540	SF07	Gray Squirrel	1/12/2016 17:09
541	SF07	Gray Squirrel	1/14/2016 6:49
542	SF07	Gray Squirrel	1/14/2016 6:50
543	SF07	Gray Squirrel	1/14/2016 6:58
544	SF07	Raccoon	12/19/2015 19:21
545	SF07	Raccoon	12/20/2015 3:14
546	SF07	Raccoon	12/26/2015 1:56
547	SF07	Raccoon	12/26/2015 4:35
548	SF07	Raccoon	1/1/2016 21:23
549	SF07	Raccoon	1/1/2016 21:28
550	SF07	Raccoon	1/1/2016 21:28
551	SF07	Raccoon	1/5/2016 0:58
552	SF07	Raccoon	1/5/2016 1:00
553	SF07	Raccoon	1/5/2016 1:03
554	SF07	Raccoon	1/6/2016 22:26
555	SF07	Raccoon	1/6/2016 22:35
556	SF07	Raccoon	1/6/2016 22:37
557	SF07	Raccoon	1/7/2016 18:14
558	SF07	Raccoon	1/7/2016 18:21
559	SF07	Raccoon	1/9/2016 4:16
560	SF07	Raccoon	1/12/2016 3:20
561	SF07	Raccoon	1/12/2016 21:45
562	SF07	Raccoon	1/12/2016 21:54
563	SF07	Raccoon	1/12/2016 21:54
564	SF07	White-tailed Deer	12/22/2015 16:49
565	SF07	White-tailed Deer	12/22/2015 16:50
566	SF07	White-tailed Deer	1/1/2016 14:39
567	SF08	Gray Squirrel	12/22/2015 6:53
568	SF08	Gray Squirrel	12/22/2015 7:18
569	SF08	Gray Squirrel	12/25/2015 7:06
570	SF08	Gray Squirrel	12/29/2015 6:51
571	SF08	Gray Squirrel	12/31/2015 6:57
572	SF08	Gray Squirrel	1/12/2016 6:56
573	SF08	Raccoon	1/11/2016 23:49
574	SF09	Raccoon	1/1/2016 20:30
575	SF09	Raccoon	1/6/2016 20:13
576	SF09	White-tailed Deer	12/26/2015 2:56
577	SF10	Bobcat	12/27/2015 8:49
578	SF10	Gray Squirrel	12/22/2015 7:11
579	SF10	Gray Squirrel	12/22/2015 7:12
580	SF10	Gray Squirrel	12/22/2015 8:09
581	SF10	Gray Squirrel	12/22/2015 8:47
582	SF10	Gray Squirrel	12/22/2015 14:56
583	SF10	Gray Squirrel	12/22/2015 14:56
584	SF10	Gray Squirrel	12/22/2015 14:59
585	SF10	Gray Squirrel	12/22/2015 15:25
586	SF10	Gray Squirrel	12/22/2015 15:27
587	SF10	Gray Squirrel	12/24/2015 7:36
588	SF10	Gray Squirrel	12/24/2015 16:23
589	SF10	Gray Squirrel	12/25/2015 16:22
590	SF10	Gray Squirrel	12/25/2015 16:22
591	SF10	Gray Squirrel	12/25/2015 16:24
592	SF10	Gray Squirrel	12/25/2015 16:26
593	SF10	Gray Squirrel	12/25/2015 16:26
594	SF10	Gray Squirrel	12/25/2015 16:26
595	SF10	Gray Squirrel	12/25/2015 16:27
596	SF10	Gray Squirrel	12/25/2015 16:28
597	SF10	Gray Squirrel	12/25/2015 16:41
598	SF10	Gray Squirrel	12/29/2015 7:03
599	SF10	Gray Squirrel	12/29/2015 7:06
600	SF10	Gray Squirrel	12/29/2015 7:07
601	SF10	Gray Squirrel	12/29/2015 7:30
602	SF10	Gray Squirrel	12/29/2015 9:03
603	SF10	Gray Squirrel	12/29/2015 9:06
604	SF10	Gray Squirrel	12/29/2015 9:08
605	SF10	Gray Squirrel	12/30/2015 7:15
606	SF10	Gray Squirrel	12/30/2015 7:46
607	SF10	Gray Squirrel	12/30/2015 7:48
608	SF10	Gray Squirrel	12/30/2015 10:28
609	SF10	Gray Squirrel	12/30/2015 16:37
610	SF10	Gray Squirrel	12/30/2015 16:38
611	SF10	Gray Squirrel	12/31/2015 7:22
612	SF10	Gray Squirrel	12/31/2015 7:39
613	SF10	Gray Squirrel	12/31/2015 7:48
614	SF10	Gray Squirrel	12/31/2015 7:59
615	SF10	Gray Squirrel	1/1/2016 8:09
616	SF10	Gray Squirrel	1/1/2016 8:15
617	SF10	Gray Squirrel	1/1/2016 8:20
618	SF10	Gray Squirrel	1/1/2016 8:28
619	SF10	Gray Squirrel	1/1/2016 8:29
620	SF10	Gray Squirrel	1/1/2016 9:14
621	SF10	Gray Squirrel	1/1/2016 9:15
622	SF10	Gray Squirrel	1/4/2016 16:46
623	SF10	Gray Squirrel	1/4/2016 16:47
624	SF10	Gray Squirrel	1/4/2016 16:57
625	SF10	Gray Squirrel	1/5/2016 10:35
626	SF10	Gray Squirrel	1/5/2016 16:45
627	SF10	Gray Squirrel	1/5/2016 16:46
628	SF10	Gray Squirrel	1/6/2016 7:55
629	SF10	Gray Squirrel	1/6/2016 7:56
630	SF10	Gray Squirrel	1/6/2016 7:57
631	SF10	Gray Squirrel	1/6/2016 7:58
632	SF10	Gray Squirrel	1/6/2016 7:59
633	SF10	Gray Squirrel	1/6/2016 7:59
634	SF10	Gray Squirrel	1/6/2016 8:02
635	SF10	Gray Squirrel	1/7/2016 8:00
636	SF10	Gray Squirrel	1/7/2016 8:01
637	SF10	Gray Squirrel	1/7/2016 8:02
638	SF10	Gray Squirrel	1/7/2016 8:05
639	SF10	Gray Squirrel	1/10/2016 7:16
640	SF10	Gray Squirrel	1/10/2016 7:17
641	SF10	Gray Squirrel	1/12/2016 16:55
642	SF10	Gray Squirrel	1/14/2016 8:34
643	SF10	Gray Squirrel	1/14/2016 8:34
644	SF10	Gray Squirrel	1/14/2016 8:55
645	SF10	Opossum	12/20/2015 20:11
646	SF10	Opossum	12/22/2015 19:39
647	SF10	Opossum	12/25/2015 20:46
648	SF10	Opossum	12/27/2015 23:21
649	SF10	Opossum	1/1/2016 18:26
650	SF10	Raccoon	12/22/2015 17:51
651	SF10	Raccoon	12/22/2015 17:52
652	SF10	Raccoon	12/22/2015 18:36
653	SF10	Raccoon	12/25/2015 19:01
654	SF10	Raccoon	12/29/2015 20:34
655	SF10	Raccoon	12/29/2015 20:57
656	SF10	Raccoon	12/30/2015 6:26
657	SF10	Raccoon	1/1/2016 18:46
658	SF10	Raccoon	1/4/2016 19:05
659	SF10	Raccoon	1/5/2016 0:31
660	SF10	Raccoon	1/5/2016 0:33
661	SF10	Raccoon	1/6/2016 19:44
662	SF10	Raccoon	1/7/2016 6:17
663	SF10	Raccoon	1/11/2016 18:08
664	SF10	Raccoon	1/12/2016 2:35
665	SF10	Raccoon	1/12/2016 2:37
666	SF10	Raccoon	1/12/2016 18:15
667	SF10	Turkey	12/25/2015 9:43
668	SF10	Turkey	12/25/2015 9:44
669	SF10	Turkey	12/25/2015 9:44
670	SF10	Turkey	12/25/2015 9:44
671	SF10	Turkey	12/25/2015 9:45
672	SF10	Turkey	12/25/2015 9:45
673	SF10	Turkey	12/25/2015 9:45
674	SF10	Turkey	12/25/2015 9:46
675	SF10	Turkey	12/25/2015 9:47
676	SF10	White-tailed Deer	12/30/2015 17:09
677	SF10	White-tailed Deer	12/30/2015 17:09
678	SF10	White-tailed Deer	1/3/2016 13:22
679	SF10	White-tailed Deer	1/3/2016 13:24
680	SF10	White-tailed Deer	1/3/2016 16:26
681	SF10	White-tailed Deer	1/3/2016 16:27
682	SF10	White-tailed Deer	1/3/2016 16:27
683	SF10	White-tailed Deer	1/3/2016 16:28
684	SF10	White-tailed Deer	1/3/2016 16:29
685	SF10	White-tailed Deer	1/3/2016 16:30
686	SF10	White-tailed Deer	1/3/2016 16:31
687	SF10	White-tailed Deer	1/3/2016 16:33
688	SF10	White-tailed Deer	1/3/2016 16:34
